# Supplementary material
Source: publisher site journal article supplement (https://www.spandidos-publications.com/2827/downloadSupplementary)
Supplement: Supplementary file 1 [file downloadSupplementary]

## Sheet: Sheet1
Table SIII. DEGs of LACC-HGT tissues.
GeneSymbol	FC(HGT_vs._LACC2)	Regulation(HGT_vs._LACC2)
A2M	-9.39748	down
A2M	-13.5537	down
A2M	-12.7463	down
A2M	-13.2577	down
A2M	-14.7174	down
AAED1	-2.49702	down
AAED1	-2.26494	down
AAED1	-2.01005	down
AANAT	2.97196	up
ABAT	-2.73076	down
ABAT	-3.60955	down
ABAT	-3.43142	down
ABCA10	3.92901	up
ABCA3	2.43782	up
ABCA5	-5.28625	down
ABCA5	-4.87651	down
ABCA7	3.61369	up
ABCA8	-3.42516	down
ABCA9	3.58813	up
ABCA9	3.35036	up
ABCA9	2.67129	up
ABCA9	4.82281	up
ABCA9	5.95339	up
ABCA9	2.56265	up
ABCA9	2.35776	up
ABCB11	-2.58054	down
ABCB9	2.80422	up
ABCB9	2.10692	up
ABCB9	2.31233	up
ABCC10	2.07627	up
ABCC10	-5.92084	down
ABCC3	-3.1747	down
ABCC3	-3.32911	down
ABCC3	-2.22684	down
ABCC3	-2.26313	down
ABCC3	-2.81527	down
ABCC3	-3.01734	down
ABCC3	-2.25087	down
ABCC3	-3.31585	down
ABCC3	-3.40654	down
ABCC3	-3.71242	down
ABCC3	-3.31536	down
ABCC4	-2.25224	down
ABCC5	-7.76532	down
ABCG1	3.39875	up
ABCG1	5.81378	up
ABCG1	6.01808	up
ABCG1	4.57744	up
ABCG1	6.41635	up
ABCG1	4.32735	up
ABHD17A	2.28193	up
ABHD18	-2.00976	down
ABHD18	-2.451	down
ABHD3	-2.10139	down
ABHD3	-3.44783	down
ABHD4	-3.46819	down
ABHD4	-3.93616	down
ABHD4	-3.82391	down
ABHD4	-3.73538	down
ABHD5	2.05218	up
ABHD8	2.3069	up
ABI2	2.32147	up
ABI3BP	2.1093	up
ABI3BP	2.09261	up
ABI3BP	2.00213	up
ABI3BP	2.33592	up
ABI3BP	2.63053	up
ABI3BP	2.14702	up
ABI3BP	2.14672	up
ABI3BP	2.25331	up
ABI3BP	2.13327	up
ABI3BP	2.17889	up
ABI3BP	2.06378	up
ABI3BP	2.02443	up
ABI3BP	2.22915	up
ABI3BP	2.11885	up
ABI3BP	2.0873	up
ABI3BP	2.14586	up
ABI3BP	2.08723	up
ABI3BP	2.0581	up
ABI3BP	2.19756	up
ABI3BP	2.04771	up
ABI3BP	2.10429	up
ABI3BP	2.11116	up
ABI3BP	2.29425	up
ABI3BP	2.16132	up
ABI3BP	2.17168	up
ABI3BP	2.20527	up
ABI3BP	2.08284	up
ABI3BP	2.30863	up
ABI3BP	2.56541	up
ABI3BP	2.05933	up
ABI3BP	2.24916	up
ABI3BP	2.20396	up
ABI3BP	2.41604	up
ABI3BP	2.00925	up
ABI3BP	2.64749	up
ABI3BP	2.01129	up
ABI3BP	2.13712	up
ABI3BP	2.10561	up
ABI3BP	2.45792	up
ABI3BP	2.12196	up
ABI3BP	2.14592	up
ABI3BP	2.12033	up
ABI3BP	2.16039	up
ABI3BP	2.0283	up
ABI3BP	2.22857	up
ABI3BP	2.25477	up
ABI3BP	2.16558	up
ABI3BP	2.30305	up
ABI3BP	2.20333	up
ABI3BP	2.4809	up
ABI3BP	2.22898	up
ABLIM1	2.01815	up
ABLIM1	2.02844	up
ABLIM1	2.54681	up
ABLIM1	2.30621	up
ABLIM1	2.02254	up
ABLIM1	2.17661	up
ABLIM1	2.00614	up
ABLIM2	-4.42901	down
ABLIM2	2.07211	up
ABLIM2	-2.13176	down
ABLIM2	-2.00846	down
ABLIM2	2.69919	up
ABLIM2	2.40426	up
ABLIM2	2.01458	up
ABLIM2	-2.0118	down
ABLIM2	2.19454	up
ABLIM2	-2.02132	down
ABRACL	2.30104	up
ABRACL	2.76784	up
ACADVL	2.06118	up
ACAT1	-6.11302	down
ACBD4	2.14942	up
ACBD4	-3.17655	down
ACBD4	-3.03939	down
ACBD5	-2.05432	down
ACBD5	-2.32609	down
ACCS	-2.23727	down
ACCS	-4.19166	down
ACCS	-2.51123	down
ACCS	-2.19243	down
ACCS	-2.34584	down
ACCS	-2.75871	down
ACCS	-2.32101	down
ACCS	-2.19192	down
ACCS	-2.55334	down
ACE	2.01855	up
ACE	2.30097	up
ACE	2.29027	up
ACE2	-2.12474	down
ACKR4	8.17128	up
ACKR4	9.57627	up
ACO1	-2.07751	down
ACOT4	2.42391	up
ACOT7	2.03296	up
ACOXL	-2.6359	down
ACP6	2.25499	up
ACP6	2.03066	up
ACSL5	2.1115	up
ACSL5	2.03375	up
ACSM5	7.36531	up
ACSM5	2.62202	up
ACSM5	6.84693	up
ACSS1	4.93867	up
ACSS1	3.42831	up
ACSS1	2.61315	up
ACSS3	2.76394	up
ACSS3	3.52905	up
ACSS3	3.18639	up
ACSS3	3.01039	up
ACSS3	3.30163	up
ACTA2	-2.07894	down
ACVR2B	2.13833	up
ACYP2	-3.26366	down
ACYP2	-2.28849	down
ADA2	-2.85954	down
ADAL	2.22035	up
ADAL	2.05687	up
ADAL	2.46499	up
ADAM12	-3.18664	down
ADAM12	-3.11663	down
ADAM12	-4.33585	down
ADAM12	-2.90085	down
ADAM12	-3.19224	down
ADAM12	-3.03381	down
ADAM12	-3.24154	down
ADAM12	-3.01773	down
ADAM19	-4.97082	down
ADAM19	-2.04236	down
ADAM19	-7.21143	down
ADAM23	2.40115	up
ADAM28	-5.98742	down
ADAM28	-4.55174	down
ADAM8	-2.63079	down
ADAMTS10	-2.20375	down
ADAMTS12	-2.08044	down
ADAMTS12	-2.3369	down
ADAMTS13	-3.25144	down
ADAMTS14	6.12235	up
ADAMTS14	4.72506	up
ADAMTS14	2.90211	up
ADAMTS14	2.30908	up
ADAMTS15	2.43559	up
ADAMTS18	7.58737	up
ADAMTS18	10.5644	up
ADAMTS18	9.1324	up
ADAMTS2	-4.69506	down
ADAMTS2	-4.59337	down
ADAMTS3	6.30709	up
ADAMTS3	4.52566	up
ADAMTS3	3.49185	up
ADAMTS6	2.00683	up
ADAMTS6	2.05121	up
ADAMTS6	2.79484	up
ADAMTS6	2.08525	up
ADAMTS6	4.71933	up
ADAMTSL3	3.4682	up
ADAMTSL3	4.09528	up
ADAMTSL3	4.64797	up
ADAMTSL3	2.59986	up
ADAMTSL3	7.14976	up
ADAMTSL3	2.09812	up
ADAMTSL3	5.25189	up
ADAMTSL3	-3.5714	down
ADAP1	4.65734	up
ADARB1	-2.1699	down
ADARB1	-2.43403	down
ADARB1	2.10575	up
ADAT2	2.10275	up
ADCY4	-2.00922	down
ADGRB1	2.39011	up
ADGRD1	2.31303	up
ADGRD1	2.16527	up
ADGRE3	-2.69892	down
ADGRG2	3.88792	up
ADGRG2	2.05274	up
ADGRG2	5.48483	up
ADGRG2	2.45739	up
ADGRG2	4.61773	up
ADGRG2	2.95693	up
ADGRG2	5.69314	up
ADGRG2	11.1668	up
ADGRG2	5.5904	up
ADGRG2	8.80219	up
ADGRG2	5.7291	up
ADGRG2	8.30237	up
ADGRG6	2.85839	up
ADGRG6	4.24438	up
ADGRL1	3.95972	up
ADGRL1	2.36293	up
ADGRL1	2.50187	up
ADGRL1	2.18688	up
ADGRL2	3.55785	up
ADGRL3	-4.16465	down
ADH1C	2.26978	up
ADIPOR1	3.16037	up
ADM	-3.164	down
ADM2	-2.02914	down
ADORA1	-4.16953	down
ADORA1	-3.69295	down
ADORA1	-3.84944	down
ADORA2B	3.43333	up
ADORA2B	4.10335	up
ADORA2B	3.85405	up
ADORA2B	4.24052	up
ADPRH	2.0035	up
ADPRHL1	-2.08112	down
ADRA1B	2.35193	up
ADRA1B	3.21192	up
ADRA1B	2.7526	up
ADRB2	6.92482	up
ADSL	-2.0019	down
ADSL	-6.09851	down
ADSL	-2.78152	down
ADSL	-3.32778	down
ADSSL1	3.39656	up
ADSSL1	4.90924	up
AEN	2.63228	up
AFAP1L1	2.10644	up
AFDN	2.12342	up
AFDN	2.31286	up
AFDN	2.05251	up
AFF2	-3.14926	down
AFF3	-9.64207	down
AFF3	-12.5652	down
AFF3	-23.9876	down
AFF3	-25.1811	down
AFF3	-11.6729	down
AFF3	-21.4136	down
AFF3	-12.0157	down
AFF3	-12.918	down
AFF3	-19.0977	down
AFF3	-14.7623	down
AFF3	-12.2779	down
AFF3	-20.4535	down
AFF3	-21.7531	down
AFF3	-15.4651	down
AFMID	-2.19938	down
AFMID	-2.77001	down
AGBL3	2.03299	up
AGBL3	12.5035	up
AGBL3	12.7342	up
AGL	-2.44865	down
AGL	-3.63786	down
AGL	-2.41667	down
AGL	-2.33166	down
AGL	-2.33047	down
AGL	-2.74595	down
AGL	-2.04708	down
AGPAT4	-2.65604	down
AGTRAP	2.00758	up
AHCY	-2.08206	down
AHI1	-2.00542	down
AHNAK2	-2.03522	down
AHR	-2.26503	down
AHRR	-2.80937	down
AHRR	-2.57455	down
AIF1	-264.665	down
AIM2	9.76116	up
AJAP1	-116.079	down
AJAP1	-86.2773	down
AJAP1	-34.7215	down
AJAP1	-14.7697	down
AJUBA	-2.99618	down
AK5	-4.6447	down
AK5	-2.96144	down
AK5	-2.71451	down
AK5	-2.03114	down
AK5	-2.4118	down
AK5	-2.45334	down
AK5	-2.17584	down
AK5	-3.02064	down
AK8	-3.40875	down
AKAP3	-2.5446	down
AKAP7	2.24864	up
AKAP7	2.00329	up
AKAP9	-2.5157	down
AKAP9	-2.07503	down
AKAP9	-2.11717	down
AKAP9	-2.05428	down
AKR1C1	3.77572	up
AKR1E2	-2.54558	down
AKR1E2	-2.4226	down
AKR1E2	-2.21274	down
AKR7A2	-2.69529	down
AKR7L	4.93853	up
AKT2	-2.15223	down
AKT2	2.11046	up
ALDH16A1	-3.01305	down
ALDH18A1	2.18082	up
ALDH1L2	-2.41002	down
ALDH1L2	-2.03833	down
ALDH1L2	-2.17274	down
ALDH1L2	-2.45753	down
ALDH1L2	-2.19025	down
ALDH1L2	-2.27545	down
ALDH3A2	2.00902	up
ALDH3A2	2.37605	up
ALDH3A2	2.26607	up
ALDOA	2.10368	up
ALDOA	2.10552	up
ALDOC	2.24537	up
ALG13	-2.0387	down
ALG13	-2.57138	down
ALG9	-2.23928	down
ALG9	-2.10205	down
ALG9	-2.86681	down
ALOX5AP	2.14197	up
ALPK2	-4.00882	down
ALPK2	-4.03451	down
ALPK2	-3.22121	down
ALPK2	-3.06437	down
ALPK2	-2.83629	down
ALPK2	3.70406	up
ALPL	-2.02333	down
ALPL	-2.18284	down
ALPL	-6.13176	down
ALPL	-7.38895	down
ALX3	4.11216	up
ALX4	-25.8959	down
AMIGO2	2.04957	up
AMIGO2	2.91231	up
AMIGO2	2.35258	up
AMMECR1L	-2.43956	down
AMMECR1L	-2.07084	down
AMOT	-4.20677	down
AMOT	-5.81502	down
AMOT	-4.00819	down
AMOTL1	2.12246	up
AMOTL1	3.18609	up
AMOTL1	2.89131	up
AMOTL1	2.10825	up
AMOTL1	2.43305	up
AMOTL2	-2.04741	down
AMPH	-3.92949	down
ANAPC1	2.25791	up
ANAPC1	-2.13367	down
ANAPC15	-4.95023	down
ANGPTL1	2.41384	up
ANGPTL1	2.05779	up
ANGPTL1	2.52253	up
ANGPTL2	-2.2742	down
ANGPTL2	-2.23986	down
ANK1	2.9866	up
ANK1	4.01949	up
ANK1	5.09145	up
ANK1	2.07793	up
ANK1	5.34144	up
ANK2	2.15484	up
ANK2	6.97219	up
ANK2	2.49829	up
ANK2	2.41455	up
ANK2	2.26578	up
ANK2	2.88766	up
ANK2	2.11409	up
ANK2	2.09591	up
ANK2	2.44268	up
ANK2	2.21022	up
ANK2	2.26719	up
ANK2	2.27897	up
ANK2	2.16982	up
ANK2	2.55257	up
ANK2	2.1885	up
ANK2	2.98596	up
ANK2	2.24808	up
ANK2	2.3385	up
ANK2	2.76425	up
ANK2	2.17814	up
ANK2	2.21554	up
ANK2	2.6256	up
ANK2	2.40711	up
ANK2	2.309	up
ANK2	2.55691	up
ANK2	2.5862	up
ANK2	2.13367	up
ANK2	2.31775	up
ANK2	2.43935	up
ANK2	2.10042	up
ANK2	2.26129	up
ANK2	2.01076	up
ANK2	2.77368	up
ANK2	5.28995	up
ANK2	2.23981	up
ANK2	2.1591	up
ANK2	5.96185	up
ANK2	2.75646	up
ANK2	2.15722	up
ANK2	2.13866	up
ANK2	5.99094	up
ANK2	2.29659	up
ANK2	2.07431	up
ANK2	2.3201	up
ANK2	3.95276	up
ANK3	-3.10025	down
ANK3	-3.08849	down
ANK3	-5.18214	down
ANK3	-2.94017	down
ANK3	-2.79165	down
ANK3	-2.87073	down
ANK3	-3.56655	down
ANK3	-3.05887	down
ANK3	-2.81612	down
ANK3	-3.94159	down
ANK3	-2.91654	down
ANK3	-3.07624	down
ANK3	-3.35117	down
ANK3	-3.38287	down
ANK3	-3.16528	down
ANK3	-2.61932	down
ANK3	-3.89311	down
ANK3	-3.35383	down
ANK3	-3.14348	down
ANK3	-3.40929	down
ANK3	-2.8248	down
ANK3	-3.07616	down
ANK3	-2.64852	down
ANK3	-4.30814	down
ANK3	-6.25474	down
ANK3	-2.23087	down
ANK3	-2.81819	down
ANK3	-3.05156	down
ANK3	-3.09882	down
ANK3	-4.84661	down
ANK3	-5.18914	down
ANK3	-2.66511	down
ANK3	-2.99183	down
ANK3	-3.12494	down
ANK3	-2.52431	down
ANK3	-4.50969	down
ANK3	-3.97071	down
ANKAR	4.33126	up
ANKAR	-2.47957	down
ANKAR	-2.21659	down
ANKAR	-2.47851	down
ANKFN1	4.05776	up
ANKFN1	3.11182	up
ANKFN1	3.87043	up
ANKFN1	2.96797	up
ANKFN1	2.99696	up
ANKFN1	2.01655	up
ANKMY1	5.58842	up
ANKMY1	-2.60468	down
ANKRD24	-2.17281	down
ANKRD26	-2.77973	down
ANKRD28	2.04803	up
ANKRD28	2.00172	up
ANKRD28	2.01816	up
ANKRD28	2.07611	up
ANKRD28	2.00463	up
ANKRD28	2.16743	up
ANKRD28	2.34993	up
ANKRD28	2.65349	up
ANKRD29	2.77891	up
ANKRD29	2.91214	up
ANKRD29	2.77555	up
ANKRD29	4.43892	up
ANKRD29	3.68152	up
ANKRD29	2.8836	up
ANKRD29	2.59779	up
ANKRD29	4.13433	up
ANKRD29	4.31996	up
ANKRD29	2.38471	up
ANKRD29	3.97992	up
ANKRD29	3.0087	up
ANKRD29	3.21228	up
ANKRD29	3.23782	up
ANKRD29	3.83092	up
ANKRD29	3.27537	up
ANKRD29	-4.01247	down
ANKRD30B	2.70537	up
ANKRD30B	-3.0885	down
ANKRD33B	2.85759	up
ANKRD33B	3.72444	up
ANKRD36	-2.81881	down
ANKRD36	-3.95909	down
ANKRD36	-5.05023	down
ANKRD6	-4.89665	down
ANKRD6	-5.81463	down
ANKRD9	2.01337	up
ANKS1B	5.67372	up
ANKS3	-2.76658	down
ANO2	-30.8199	down
ANO4	-4.36342	down
ANO6	-2.65988	down
ANO6	-2.17956	down
ANTXRL	-3.61452	down
ANTXRL	-4.3531	down
ANXA10	17.7042	up
ANXA10	16.1628	up
ANXA11	2.05269	up
ANXA3	18.2545	up
ANXA3	18.0942	up
AOX1	-2.05859	down
AP1G2	2.17386	up
AP1S3	4.5506	up
AP1S3	3.25575	up
AP4E1	-2.4295	down
AP4E1	-2.13923	down
AP4E1	-2.0746	down
AP4E1	-3.79254	down
APAF1	2.21131	up
APBA2	-3.59112	down
APBA2	-2.62597	down
APBA2	-6.89233	down
APBA2	-2.20396	down
APBA2	-7.11925	down
APBA2	-5.02656	down
APBA2	-2.15252	down
APBA2	-2.21085	down
APBA2	-2.61473	down
APBA2	-2.76902	down
APBA2	-2.30657	down
APBB2	2.57075	up
APC2	2.15611	up
APLN	7.61636	up
APLNR	-6.53245	down
APOBEC3G	2.32769	up
APOBEC3G	2.24384	up
APOBEC3G	2.87459	up
APOBEC3G	2.14832	up
APOL3	3.08767	up
APOL3	2.62609	up
APOL3	2.79838	up
APOL3	3.02722	up
APOL3	3.07324	up
APOL3	2.93288	up
APOL3	3.1488	up
APOL3	3.24431	up
APOL3	3.12481	up
APOL3	3.17067	up
APOL3	3.12048	up
APOL3	2.6927	up
APOL4	4.82219	up
APOL4	2.46718	up
APOL4	3.51772	up
AQP1	2.56387	up
AQP1	2.19595	up
AQP3	-5.69797	down
AQP3	-2.49313	down
AQP3	-5.10239	down
AR	-8.97488	down
AR	-6.62066	down
AR	-4.58453	down
ARAP3	-5.8096	down
ARAP3	-4.41343	down
ARHGAP11A	-2.06535	down
ARHGAP11A	5.2338	up
ARHGAP22	3.86823	up
ARHGAP22	2.08935	up
ARHGAP22	2.17992	up
ARHGAP22	2.16401	up
ARHGAP22	2.05752	up
ARHGAP22	2.17384	up
ARHGAP22	2.10519	up
ARHGAP22	2.35998	up
ARHGAP22	2.22573	up
ARHGAP22	2.43238	up
ARHGAP22	2.22087	up
ARHGAP22	2.06014	up
ARHGAP22	2.47104	up
ARHGAP22	2.38252	up
ARHGAP22	2.44172	up
ARHGAP22	3.9337	up
ARHGAP22	2.23558	up
ARHGAP23	-2.00997	down
ARHGAP26	2.53812	up
ARHGAP26	3.47376	up
ARHGAP26	2.27987	up
ARHGAP26	3.58285	up
ARHGAP26	2.26565	up
ARHGAP26	3.01623	up
ARHGAP26	2.01197	up
ARHGAP26	2.11827	up
ARHGAP26	4.89406	up
ARHGAP26	2.3306	up
ARHGAP26	3.13938	up
ARHGAP26	2.86226	up
ARHGAP27	5.4834	up
ARHGAP27	2.19062	up
ARHGAP27	2.09591	up
ARHGAP27	2.20018	up
ARHGAP27	5.54313	up
ARHGAP27	2.12241	up
ARHGAP27	3.14817	up
ARHGAP27	2.68412	up
ARHGAP27	3.88189	up
ARHGAP27	2.36738	up
ARHGAP27	2.90667	up
ARHGAP27	2.26979	up
ARHGAP27	3.6566	up
ARHGAP27	3.5373	up
ARHGAP28	-3.66138	down
ARHGAP28	-2.54415	down
ARHGAP31	-2.04934	down
ARHGAP42	2.30937	up
ARHGAP6	2.21757	up
ARHGAP6	4.38876	up
ARHGAP6	2.07664	up
ARHGAP6	2.04536	up
ARHGEF19	2.80042	up
ARHGEF19	2.63259	up
ARHGEF2	-2.11568	down
ARHGEF28	-2.29233	down
ARHGEF37	4.8167	up
ARHGEF37	6.12904	up
ARHGEF37	4.91431	up
ARHGEF37	5.36198	up
ARHGEF37	3.92871	up
ARHGEF37	3.85605	up
ARHGEF37	5.90122	up
ARHGEF5	2.11397	up
ARHGEF7	-2.0217	down
ARHGEF9	-2.30564	down
ARID3A	-2.99696	down
ARID3A	-2.47048	down
ARID3A	-4.72101	down
ARID4A	-2.13055	down
ARID4A	4.56297	up
ARL13B	-2.23285	down
ARL13B	-2.18616	down
ARL13B	-2.05954	down
ARL13B	-2.0894	down
ARL6	-3.85657	down
ARMC2	5.10854	up
ARMC2	2.14058	up
ARMC2	-3.03753	down
ARMC5	2.35208	up
ARMC7	2.03831	up
ARMC8	2.2292	up
ARMC8	-2.15071	down
ARMC9	-2.1938	down
ARMC9	-2.34995	down
ARMC9	-2.42672	down
ARMC9	-2.48771	down
ARMC9	-2.0552	down
ARMH1	4.68913	up
ARMH1	2.13556	up
ARMH1	-2.87345	down
ARNTL	2.67013	up
ARNTL	3.39785	up
ARNTL	2.95664	up
ARNTL	2.78969	up
ARNTL	2.65572	up
ARNTL	2.62178	up
ARNTL	2.07629	up
ARNTL	2.87931	up
ARNTL	2.97352	up
ARNTL	3.39419	up
ARNTL	2.20881	up
ARNTL	2.9929	up
ARNTL	2.79392	up
ARNTL	2.27467	up
ARNTL	2.45063	up
ARNTL	2.78055	up
ARNTL	3.05532	up
ARNTL	2.55933	up
ARNTL	3.99277	up
ARNTL	2.99073	up
ARNTL	2.38264	up
ARNTL	3.09668	up
ARNTL	2.47726	up
ARNTL	2.7367	up
ARNTL	2.35571	up
ARNTL	3.3517	up
ARNTL	2.70827	up
ARNTL	2.22477	up
ARNTL	2.50078	up
ARNTL	2.96039	up
ARNTL	2.86554	up
ARNTL	2.38205	up
ARNTL	3.40699	up
ARNTL	2.74039	up
ARNTL	2.20114	up
ARNTL	2.33196	up
ARNTL	2.88737	up
ARNTL	2.44682	up
ARNTL	2.46026	up
ARNTL	2.69316	up
ARNTL	2.48603	up
ARNTL	3.19687	up
ARNTL	2.69232	up
ARNTL	2.95116	up
ARNTL	3.03483	up
ARNTL2	2.24994	up
ARNTL2	2.12086	up
ARNTL2	5.2871	up
ARNTL2	4.40171	up
ARNTL2	2.47538	up
ARNTL2	2.11065	up
ARNTL2	5.41523	up
ARNTL2	2.36279	up
ARPC1B	2.27939	up
ARPC1B	2.29245	up
ARPC1B	2.32296	up
ARPC1B	2.30145	up
ARPP21	-2.25227	down
ARPP21	-2.09206	down
ARPP21	-4.69783	down
ARRB2	2.54024	up
ARRB2	2.03715	up
ARSE	4.35262	up
ARSE	5.21974	up
ARSE	2.5873	up
ARSE	2.92834	up
ARSE	6.88986	up
ARSE	3.84532	up
ARSE	5.804	up
ARSG	3.77443	up
ARSG	-3.35095	down
ART1	9.93213	up
ART1	3.67746	up
ARVCF	4.55478	up
ASAH1	2.04147	up
ASAH1	2.3666	up
ASAH2	2.19597	up
ASAH2	4.6073	up
ASAP1	-3.88652	down
ASAP1	-3.03533	down
ASAP1	-3.36698	down
ASAP1	-3.34127	down
ASAP1	-3.05069	down
ASAP1	-3.59019	down
ASAP1	-3.73072	down
ASAP1	-3.18291	down
ASAP1	-3.88927	down
ASAP1	-2.97261	down
ASAP1	-3.2207	down
ASAP1	-4.29716	down
ASB3	3.59325	up
ASB4	-6.40213	down
ASGR2	-2.14563	down
ASPA	3.87808	up
ASPA	3.14127	up
ASPA	2.03125	up
ASPA	2.45167	up
ASRGL1	-3.4942	down
ASTN2	2.59141	up
ATAD5	-3.12251	down
ATE1	-2.53857	down
ATE1	-2.41591	down
ATF3	-2.57888	down
ATF3	-2.24553	down
ATF3	-2.28675	down
ATF3	-2.84405	down
ATF3	-2.67777	down
ATF3	-2.12909	down
ATF3	-2.13351	down
ATF3	-2.6603	down
ATF3	-2.06246	down
ATG13	-2.10526	down
ATG13	-2.83257	down
ATG13	-2.1305	down
ATG13	-3.81911	down
ATG4B	2.00011	up
ATG4C	-2.1049	down
ATG4C	-2.1525	down
ATG4C	-2.65769	down
ATG4C	-2.38953	down
ATG4C	-2.90862	down
ATG7	4.30387	up
ATG7	2.70545	up
ATL1	2.24513	up
ATP10A	2.0592	up
ATP10A	2.21458	up
ATP11B	-2.73423	down
ATP11C	-2.12183	down
ATP11C	-2.61644	down
ATP11C	-2.07189	down
ATP11C	-2.19645	down
ATP11C	-2.09724	down
ATP1A3	-2.80147	down
ATP1A3	-2.73613	down
ATP1A3	-2.43478	down
ATP6AP1L	-2.34609	down
ATP6AP1L	-2.63459	down
ATP6V0E2	4.79831	up
ATP6V1E2	-2.02306	down
ATP7B	-2.70859	down
ATP7B	-2.90804	down
ATP7B	-2.24697	down
ATP7B	-2.76975	down
ATP7B	-3.05533	down
ATP7B	-2.21079	down
ATP7B	-4.69647	down
ATP7B	-2.23961	down
ATP8A1	2.15807	up
ATP8A2	-20.4002	down
ATP8B4	-13.8552	down
ATP9B	2.12616	up
ATP9B	-2.05618	down
ATPAF2	-2.12827	down
ATR	2.61212	up
ATXN1	-2.10932	down
ATXN7L1	2.11119	up
ATXN7L1	4.40024	up
ATXN7L1	3.12791	up
AURKC	-2.10447	down
AVPI1	2.20115	up
AXIN2	-3.51638	down
AXIN2	-3.04595	down
AZIN2	4.65288	up
AZIN2	2.43808	up
AZIN2	2.49534	up
AZIN2	3.39735	up
AZIN2	2.08995	up
AZIN2	2.29341	up
AZIN2	-2.09376	down
B2M	2.32837	up
B3GALNT1	-2.90945	down
B3GALNT1	-2.54779	down
B3GALNT1	-2.14949	down
B3GALNT1	2.0341	up
B3GALNT1	2.76867	up
B3GAT1	2.00677	up
B3GLCT	-2.04301	down
B3GLCT	-2.02477	down
B3GLCT	-2.43749	down
B4GALT4	-2.25797	down
B4GALT4	-2.25388	down
B4GALT6	-5.86542	down
B4GALT6	-2.76189	down
B9D1	3.24187	up
B9D1	2.4816	up
BACE2	-5.81681	down
BAG2	4.0933	up
BAG2	6.25058	up
BAIAP2	-2.01648	down
BASP1	-3.47389	down
BASP1	-3.72034	down
BATF2	4.95765	up
BATF2	2.17338	up
BAZ1A	-2.01047	down
BAZ2B	-2.11931	down
BAZ2B	-2.33492	down
BAZ2B	-2.9381	down
BAZ2B	-2.47742	down
BAZ2B	2.05519	up
BBOF1	-4.60573	down
BBOX1	7.74993	up
BBOX1	7.79761	up
BBOX1	3.99867	up
BBS12	-2.8872	down
BBS7	-2.0504	down
BCAP31	2.76997	up
BCAT1	2.04097	up
BCL2L11	-2.13001	down
BCL2L11	-2.01114	down
BCL2L11	-2.09451	down
BCL2L11	-2.28806	down
BCL2L11	-2.13912	down
BCL2L12	-3.73041	down
BCL2L12	8.50683	up
BCL2L12	-2.30132	down
BCL2L14	15.9512	up
BCL3	2.21943	up
BCL3	3.22019	up
BCL6	-4.13054	down
BCL6	-2.21424	down
BCL7C	2.21965	up
BCLAF3	-2.09947	down
BCR	-2.38331	down
BCS1L	-2.177	down
BDH1	5.73272	up
BDKRB1	3.50185	up
BDNF	2.1479	up
BDNF	2.68372	up
BDNF	2.41706	up
BDNF	2.39993	up
BDNF	2.06721	up
BDNF	2.09789	up
BEAN1	3.63576	up
BEAN1	2.21799	up
BEGAIN	2.0561	up
BEGAIN	3.49754	up
BEND7	2.03014	up
BEND7	2.40144	up
BEND7	2.28622	up
BEST1	-2.00936	down
BEST1	-2.99719	down
BEX1	-10.6415	down
BEX2	-11.6547	down
BEX2	-8.35468	down
BEX2	-8.98951	down
BEX2	-12.6128	down
BHLHE40	2.16482	up
BHLHE40	2.22201	up
BICRA	-2.35129	down
BICRA	-2.37318	down
BICRA	-2.35221	down
BIRC5	2.94918	up
BMP4	7.07701	up
BMP4	5.54388	up
BMP4	6.57562	up
BMP4	7.90009	up
BMP4	4.87231	up
BMP4	6.50124	up
BMP4	6.77724	up
BMP4	7.07554	up
BMP4	5.99965	up
BMP5	-4.76199	down
BMP6	-2.2014	down
BMPER	3.72792	up
BMPER	4.60813	up
BMPER	2.86232	up
BMPER	2.7352	up
BMPR1B	4.38586	up
BMPR1B	2.23733	up
BMPR1B	2.65688	up
BMPR1B	3.98715	up
BMPR1B	2.76518	up
BMPR1B	2.22988	up
BMPR1B	3.24172	up
BNC1	-3.2356	down
BNC1	-3.85156	down
BOLL	2.33495	up
BOLL	2.59093	up
BPHL	-2.95907	down
BPTF	-2.25881	down
BPTF	-4.81353	down
BPTF	-2.00252	down
BRCA1	-2.21211	down
BRI3	4.27333	up
BRIP1	-2.10063	down
BRIP1	-2.05925	down
BST2	25.7555	up
BTC	4.59945	up
BTN2A1	-2.75904	down
BTN3A1	2.05477	up
BZW1	2.05501	up
BZW1	2.14131	up
BZW1	2.12445	up
BZW1	2.25806	up
BZW1	2.05247	up
BZW1	2.05471	up
C10orf105	2.08417	up
C10orf113	-8.34472	down
C10orf67	3.63009	up
C10orf82	3.29894	up
C10orf82	-2.01416	down
C11orf16	-4.87274	down
C11orf65	2.9383	up
C11orf74	5.33537	up
C11orf74	3.22568	up
C11orf74	7.5075	up
C11orf74	3.60558	up
C11orf74	-4.72883	down
C11orf80	2.06648	up
C11orf87	2.43077	up
C11orf91	3.31335	up
C12orf42	-2.24732	down
C12orf73	-2.79784	down
C13orf46	-3.83833	down
C13orf46	-3.86084	down
C14orf132	2.10094	up
C14orf93	2.73743	up
C15orf32	-3.98213	down
C15orf59	2.42433	up
C15orf65	-2.02327	down
C16orf46	-2.66468	down
C16orf46	-2.06004	down
C16orf89	-2.11127	down
C17orf58	2.40331	up
C18orf54	2.07556	up
C19orf44	-2.25664	down
C19orf47	5.25634	up
C19orf66	2.13882	up
C19orf66	2.48328	up
C1QTNF7	2.62484	up
C1QTNF7	2.00246	up
C1orf105	-28.5351	down
C1orf109	-2.36139	down
C1orf109	-2.19671	down
C1orf109	-2.68892	down
C1orf109	-2.6965	down
C1orf109	-2.30789	down
C1orf109	-2.385	down
C1orf109	-2.28721	down
C1orf109	-2.08369	down
C1orf109	-2.51506	down
C1orf109	-2.23741	down
C1orf109	-2.00958	down
C1orf109	-2.5596	down
C1orf109	-3.24885	down
C1orf109	-2.30328	down
C1orf109	-2.01202	down
C1orf109	-2.52782	down
C1orf109	-2.10642	down
C1orf109	-3.02626	down
C1orf109	-2.15003	down
C1orf116	-2.10034	down
C1orf127	2.52171	up
C1orf159	-4.61069	down
C1orf194	-2.1641	down
C1orf198	-2.48605	down
C1orf198	-2.36125	down
C1orf198	-3.24267	down
C1orf198	-2.68767	down
C1orf210	-2.16583	down
C1orf210	-4.78589	down
C1orf61	3.30241	up
C1orf61	3.26677	up
C1orf61	-3.91122	down
C2	5.70008	up
C2	7.29172	up
C2	5.52801	up
C2	8.65614	up
C2	6.50934	up
C2	8.31738	up
C2	4.87307	up
C2	8.77828	up
C2	3.4244	up
C2	4.45603	up
C2	3.99411	up
C2	2.16244	up
C2	3.99841	up
C2	5.59413	up
C2	5.40253	up
C2	7.57169	up
C2	5.71023	up
C2	8.40579	up
C2	4.34181	up
C2	9.64331	up
C2	3.39191	up
C2	5.40751	up
C2	8.08778	up
C2	-3.94377	down
C2	-4.09597	down
C2	-4.30378	down
C2	-3.95467	down
C2	-7.32981	down
C2	-3.36935	down
C2	5.2451	up
C2	6.81097	up
C2	5.13759	up
C2	8.07213	up
C2	6.71866	up
C2	3.9296	up
C2	6.40818	up
C2	3.70349	up
C2	9.09565	up
C2	3.19489	up
C2	5.47499	up
C2	10.5459	up
C20orf197	2.82263	up
C21orf91	-2.26457	down
C21orf91	-2.37389	down
C22orf42	4.1687	up
C2orf27A	-2.08091	down
C2orf71	-11.4316	down
C2orf73	5.68992	up
C2orf74	-2.07714	down
C2orf74	-2.33081	down
C2orf91	2.85237	up
C3orf35	2.75957	up
C3orf35	2.01412	up
C3orf35	-2.96161	down
C3orf36	7.16187	up
C3orf52	3.18553	up
C3orf52	4.15571	up
C3orf52	2.9505	up
C3orf58	-2.19789	down
C3orf67	3.66694	up
C3orf67	4.9769	up
C3orf67	4.56371	up
C3orf67	4.38933	up
C3orf67	3.0586	up
C5AR1	-2.89969	down
C5AR1	-2.7827	down
C5orf34	-2.21354	down
C5orf38	2.78827	up
C5orf60	4.57667	up
C6orf52	-4.67016	down
C6orf52	-4.61616	down
C6orf99	-4.4141	down
C7	2.35924	up
C7orf31	-2.41462	down
C7orf57	2.43737	up
C7orf65	-5.07234	down
C8orf34	-2.47512	down
C8orf34	-2.35528	down
C8orf34	-2.02068	down
C8orf34	-2.80824	down
C8orf34	-2.53397	down
C9orf147	2.05397	up
C9orf3	2.18329	up
C9orf3	2.25083	up
C9orf3	2.12823	up
C9orf3	2.37164	up
C9orf3	2.00293	up
C9orf3	2.21821	up
C9orf3	2.28184	up
C9orf43	2.34474	up
C9orf47	5.12163	up
C9orf72	-2.50559	down
CA5B	3.41616	up
CA5B	3.07071	up
CA5B	3.13885	up
CA5B	3.11163	up
CA5B	3.47142	up
CA7	3.68564	up
CAB39	-3.04578	down
CAB39L	-3.29863	down
CAB39L	-2.23109	down
CAB39L	-6.0708	down
CABCOCO1	-2.21729	down
CABCOCO1	-3.30469	down
CABCOCO1	-2.92025	down
CABIN1	2.05847	up
CABYR	3.12615	up
CABYR	2.96711	up
CABYR	2.09101	up
CACHD1	4.101	up
CACNA1A	2.87026	up
CACNA1A	2.58266	up
CACNA1A	4.03055	up
CACNA1A	2.93834	up
CACNA1C	-5.34425	down
CACNA1C	-2.72527	down
CACNA1C	-2.42021	down
CACNA1C	-2.05665	down
CACNA1C	-2.08372	down
CACNA1C	-2.02588	down
CACNA1C	-2.50022	down
CACNA1C	-2.46234	down
CACNA1C	-2.11624	down
CACNA1G	-2.15967	down
CACNA1G	-2.66761	down
CACNA1H	-10.4161	down
CACNA1H	-4.15517	down
CACNA1H	-4.75061	down
CACNA1H	-2.58578	down
CACNA1H	-7.63423	down
CACNA1H	-4.70108	down
CACNA1H	-3.13752	down
CACNA1H	-3.99432	down
CACNA1H	-3.83688	down
CACNA1H	-3.9109	down
CACNA1H	-5.08032	down
CACNA1H	-7.2744	down
CACNA1H	-6.01479	down
CACNB2	-2.18781	down
CACNB2	-2.04229	down
CACNB2	-2.37326	down
CACNB2	-2.52014	down
CACNB2	-2.58848	down
CACNB2	-2.58426	down
CACNB2	-2.52479	down
CACNB2	-3.33953	down
CACNB2	-2.44135	down
CACNB4	-3.7768	down
CACNG6	2.50347	up
CADM1	3.2161	up
CADM2	3.27267	up
CADM2	4.27041	up
CADPS	2.07589	up
CADPS	2.19899	up
CADPS	3.17266	up
CADPS2	4.07185	up
CADPS2	2.26671	up
CALCOCO1	-2.86377	down
CALCOCO1	-2.01497	down
CALD1	-3.09939	down
CALD1	-3.20459	down
CALD1	-3.53225	down
CALD1	-2.96667	down
CALD1	-4.1884	down
CALD1	-3.40598	down
CALD1	-2.75155	down
CALD1	-3.28101	down
CALD1	-3.32749	down
CALD1	-3.27211	down
CALD1	-3.21023	down
CALD1	-3.07514	down
CALD1	-3.54354	down
CALD1	-3.35982	down
CALD1	-3.0515	down
CALD1	-2.9063	down
CALD1	-3.29693	down
CALD1	-3.24778	down
CALD1	-3.42491	down
CALD1	-3.23409	down
CALD1	-3.37377	down
CAMK1D	3.65609	up
CAMK1D	6.15373	up
CAMK2B	-3.14229	down
CAMK2B	-2.07502	down
CAMK2B	-2.20099	down
CAMKK1	2.67134	up
CAMKK1	2.31479	up
CAMP	-3.11498	down
CAMTA1	-2.98186	down
CAPRIN2	5.17186	up
CAPRIN2	5.05007	up
CAPRIN2	2.69195	up
CAPRIN2	4.89559	up
CAPRIN2	5.58983	up
CAPRIN2	3.93519	up
CAPRIN2	2.25502	up
CAPRIN2	4.69171	up
CAPRIN2	4.22433	up
CAPRIN2	4.01536	up
CAPRIN2	3.3409	up
CAPRIN2	3.65759	up
CAPRIN2	3.24644	up
CAPRIN2	3.40282	up
CAPRIN2	3.74404	up
CAPRIN2	3.23488	up
CAPRIN2	4.3659	up
CAPRIN2	4.9714	up
CAPRIN2	3.30482	up
CAPRIN2	4.1124	up
CAPRIN2	3.51885	up
CAPRIN2	4.16624	up
CAPRIN2	4.28016	up
CAPRIN2	5.03171	up
CAPRIN2	3.01247	up
CAPRIN2	3.24423	up
CAPRIN2	4.91669	up
CAPRIN2	5.25355	up
CAPRIN2	4.16297	up
CAPRIN2	2.8249	up
CAPRIN2	4.25252	up
CAPRIN2	2.62142	up
CAPRIN2	5.32653	up
CAPRIN2	4.78678	up
CAPRIN2	4.93286	up
CAPRIN2	5.19076	up
CAPRIN2	8.20719	up
CAPRIN2	4.83383	up
CAPRIN2	3.99123	up
CAPRIN2	5.12762	up
CAPRIN2	4.16064	up
CAPRIN2	4.13929	up
CAPRIN2	4.57999	up
CAPRIN2	4.33206	up
CAPRIN2	4.96077	up
CAPRIN2	3.51332	up
CAPRIN2	3.93829	up
CAPRIN2	4.28253	up
CAPRIN2	3.35916	up
CAPRIN2	4.10687	up
CAPRIN2	2.74002	up
CAPRIN2	4.58482	up
CARD14	-2.8151	down
CARD17	3.29055	up
CARD8	2.23041	up
CARD8	-3.39969	down
CARD8	2.08156	up
CARF	-2.15831	down
CARMIL2	-2.48904	down
CARMIL2	-5.45505	down
CARMIL2	-3.22995	down
CARMIL2	-2.21322	down
CARS2	-2.40048	down
CASP1	2.52546	up
CASP1	2.34569	up
CASP1	2.00462	up
CASP10	3.23034	up
CASP10	2.76354	up
CASP10	2.48155	up
CASP10	5.04445	up
CASP10	2.54522	up
CASP7	-2.18184	down
CASP7	-2.41958	down
CASP7	-2.2717	down
CASP7	-2.07621	down
CASP7	-2.10182	down
CASP7	-2.12139	down
CASP8	3.62297	up
CASP9	2.45983	up
CASS4	-9.29684	down
CASS4	-9.28872	down
CASS4	-13.3916	down
CATSPER1	3.48403	up
CATSPERD	-5.0388	down
CATSPERE	-2.29433	down
CATSPERE	-2.66074	down
CATSPERE	-2.15402	down
CATSPERE	-2.29785	down
CATSPERE	-2.16892	down
CATSPERE	-2.74409	down
CATSPERG	2.18983	up
CATSPERG	2.01272	up
CATSPERG	-4.76436	down
CAV2	-2.02799	down
CAV2	-2.03544	down
CAV2	-2.01055	down
CAVIN2	3.80751	up
CBLB	-2.13675	down
CBLB	-2.12971	down
CBLB	-2.14852	down
CBLN4	-2.2239	down
CBR1	2.31355	up
CBR4	2.12643	up
CBWD5	2.14055	up
CC2D1B	-2.65069	down
CCBE1	-4.96449	down
CCDC102A	-4.02738	down
CCDC103	2.0623	up
CCDC112	3.45485	up
CCDC116	-4.39863	down
CCDC12	-2.17171	down
CCDC12	-2.0946	down
CCDC120	-2.0704	down
CCDC121	-3.51907	down
CCDC122	4.31437	up
CCDC122	2.35059	up
CCDC122	2.13976	up
CCDC122	2.24704	up
CCDC122	2.13074	up
CCDC122	2.06118	up
CCDC125	2.57354	up
CCDC125	2.058	up
CCDC125	2.11668	up
CCDC125	3.04972	up
CCDC125	2.23939	up
CCDC125	2.02323	up
CCDC125	2.23877	up
CCDC125	2.00454	up
CCDC126	-2.15217	down
CCDC126	-2.61565	down
CCDC126	-2.72193	down
CCDC136	-3.66579	down
CCDC136	-2.13063	down
CCDC136	-2.00561	down
CCDC136	-2.18344	down
CCDC138	-2.77791	down
CCDC138	-2.16684	down
CCDC138	-4.44044	down
CCDC14	3.1247	up
CCDC148	-3.94525	down
CCDC148	-4.3557	down
CCDC150	2.12238	up
CCDC150	2.57062	up
CCDC159	2.43009	up
CCDC159	2.7972	up
CCDC159	2.4489	up
CCDC159	2.26014	up
CCDC159	2.27395	up
CCDC169	2.32741	up
CCDC170	-4.24107	down
CCDC171	-2.57621	down
CCDC18	-2.40562	down
CCDC186	-2.37529	down
CCDC190	3.31633	up
CCDC191	-2.06073	down
CCDC191	-2.80303	down
CCDC191	3.50809	up
CCDC3	14.1916	up
CCDC3	6.34227	up
CCDC33	-2.30062	down
CCDC33	-2.9482	down
CCDC36	-5.47087	down
CCDC36	-9.50108	down
CCDC36	-5.12665	down
CCDC36	-3.40427	down
CCDC36	-8.33958	down
CCDC40	2.18363	up
CCDC42	-4.78738	down
CCDC57	2.21121	up
CCDC57	2.06117	up
CCDC57	2.43772	up
CCDC58	-2.03593	down
CCDC62	-3.82494	down
CCDC66	2.32196	up
CCDC66	2.01281	up
CCDC68	2.18756	up
CCDC69	3.40671	up
CCDC7	-3.0498	down
CCDC7	-2.19652	down
CCDC85A	-4.19226	down
CCDC85A	-4.30876	down
CCDC85A	-4.15669	down
CCDC85C	-4.41747	down
CCDC9B	3.18188	up
CCHCR1	-2.00187	down
CCHCR1	2.38821	up
CCL13	-12.8848	down
CCL2	-2.19411	down
CCL20	10.4724	up
CCL20	10.8227	up
CCL4	-3.07821	down
CCL4L2	-2.91093	down
CCL4L2	-4.38245	down
CCL4L2	2.22238	up
CCL4L2	2.4077	up
CCL4L2	4.75506	up
CCL5	15.9853	up
CCL5	14.7069	up
CCL5	13.2046	up
CCL5	14.4607	up
CCL7	-3.94611	down
CCNB1	2.04861	up
CCND1	2.32307	up
CCND2	7.21763	up
CCNE1	5.06003	up
CCNJL	2.53918	up
CCNJL	2.04499	up
CCR10	2.07234	up
CD200	34.8503	up
CD200	24.4773	up
CD200	62.498	up
CD200	94.6872	up
CD200	105.191	up
CD200	47.2088	up
CD200	29.8336	up
CD200	27.3029	up
CD200	57.4013	up
CD200	30.3436	up
CD200	39.2889	up
CD200	38.8223	up
CD200	56.1378	up
CD200	64.9715	up
CD200	33.0598	up
CD200	37.6961	up
CD200	64.5419	up
CD200	59.2153	up
CD200	30.4836	up
CD22	2.49951	up
CD226	-2.24043	down
CD244	-3.51389	down
CD27	2.09328	up
CD274	5.49046	up
CD300A	3.75264	up
CD4	-2.50384	down
CD40	-5.76278	down
CD40	-3.93951	down
CD40	-2.25625	down
CD40	-8.60877	down
CD40	-6.74814	down
CD40	-4.32473	down
CD40	-2.79722	down
CD40	-7.63388	down
CD40	-3.20102	down
CD40	-3.31247	down
CD40LG	3.36884	up
CD53	2.01261	up
CD74	2.56706	up
CD82	3.41493	up
CD82	4.09697	up
CD9	3.17582	up
CD9	2.71406	up
CD9	3.03437	up
CD99	2.31209	up
CD99L2	-2.23376	down
CDADC1	-4.08297	down
CDADC1	-2.41539	down
CDC14A	2.38663	up
CDC14A	2.02377	up
CDC14B	-2.58539	down
CDC14B	-2.44933	down
CDC14B	-4.97102	down
CDC14B	-3.27665	down
CDC14B	-2.86401	down
CDC14B	-3.08799	down
CDC14B	-3.13666	down
CDC14B	-2.39453	down
CDC14B	-3.23502	down
CDC14B	-3.67168	down
CDC14B	-3.04865	down
CDC14B	-4.81492	down
CDC14B	-2.8078	down
CDC14B	-2.74375	down
CDC14B	-2.63228	down
CDC14B	-2.79978	down
CDC14B	-4.62269	down
CDC14B	-3.60852	down
CDC14B	-5.22039	down
CDC14B	-4.48295	down
CDC14B	-4.80413	down
CDC14B	-2.78909	down
CDC14B	-6.36453	down
CDC14B	-3.08888	down
CDC14B	-2.63398	down
CDC14B	-3.00551	down
CDC14B	-5.13356	down
CDC25A	-2.0441	down
CDC25C	2.15634	up
CDC42EP3	-4.21707	down
CDC42EP3	-4.27789	down
CDC42EP3	-4.29653	down
CDC42EP3	-4.27577	down
CDC42EP3	-4.1698	down
CDC7	2.11851	up
CDCA3	-6.41898	down
CDCP1	8.71953	up
CDCP1	17.8145	up
CDCP1	14.0754	up
CDCP1	11.8602	up
CDH13	-2.92401	down
CDH13	-2.33858	down
CDH13	-2.54466	down
CDH13	-2.25713	down
CDH13	-2.92603	down
CDH13	-2.52292	down
CDH13	-3.10207	down
CDH16	-2.97713	down
CDH18	-48.1893	down
CDH18	10.6813	up
CDH18	6.88076	up
CDH18	6.62943	up
CDH18	8.05961	up
CDH18	9.7241	up
CDH18	7.00083	up
CDH18	7.0115	up
CDH18	6.38789	up
CDH26	-2.1109	down
CDH3	-4.02795	down
CDH6	2.80049	up
CDH6	3.03274	up
CDH6	5.19177	up
CDH6	2.54086	up
CDH6	2.47687	up
CDHR3	-4.71926	down
CDHR3	-2.63064	down
CDHR3	-2.3001	down
CDHR3	-3.11567	down
CDK1	3.61478	up
CDK14	2.22365	up
CDK15	2.57538	up
CDK15	3.15301	up
CDK15	2.01681	up
CDK15	2.11309	up
CDK18	-3.05599	down
CDK18	-3.29546	down
CDK2	2.81824	up
CDK20	-2.14705	down
CDK20	-2.4218	down
CDK20	-2.14406	down
CDK5R1	-4.87063	down
CDKL1	2.14755	up
CDKL3	2.6635	up
CDKL3	-2.03951	down
CDKN2A	2.58899	up
CDKN2A	2.64626	up
CDKN2A	3.01617	up
CDKN2A	3.39114	up
CDKN2A	3.25563	up
CDKN2A	2.91191	up
CDKN2B	-2.37556	down
CDO1	2.20045	up
CDO1	3.15136	up
CDO1	7.14193	up
CDO1	3.99125	up
CDO1	2.6413	up
CDO1	2.5793	up
CDO1	7.13473	up
CDO1	3.74195	up
CDYL2	-4.15012	down
CDYL2	-3.18212	down
CDYL2	-4.27072	down
CEACAM4	2.2851	up
CEACAM5	3.22965	up
CEBPA	-2.49635	down
CEBPA	-2.6364	down
CEBPG	-2.04074	down
CELA1	2.01205	up
CELF2	2.81231	up
CELF2	2.52572	up
CELF2	2.31507	up
CELF2	2.07175	up
CELF2	3.85459	up
CELF2	2.19853	up
CELF2	2.69227	up
CELF2	2.03863	up
CELF2	2.13461	up
CELF2	3.05572	up
CELF2	3.96586	up
CELF2	2.07133	up
CELF2	2.08184	up
CELF2	2.17265	up
CELF2	2.11593	up
CELF2	2.26665	up
CELF2	-2.50015	down
CELF2	4.31583	up
CELF2	3.14485	up
CELF2	2.46179	up
CELF2	4.41107	up
CELF2	2.06983	up
CELF2	2.35587	up
CELF3	4.85711	up
CELF3	-3.5741	down
CELF4	-2.00422	down
CELF4	7.06519	up
CELF4	3.39884	up
CELF4	5.07009	up
CELF4	2.39457	up
CELF4	5.18457	up
CELF4	6.21312	up
CELF4	4.41082	up
CELF4	2.10115	up
CELF4	5.91884	up
CELF4	3.03413	up
CELF4	2.30477	up
CELSR1	-2.39295	down
CEMIP2	-2.4747	down
CEMIP2	-2.6843	down
CEMIP2	-2.5873	down
CEMIP2	-3.14312	down
CENPI	4.45329	up
CEP112	-2.38313	down
CEP112	-2.13007	down
CEP135	-2.11568	down
CEP152	-2.57708	down
CEP152	-3.4361	down
CEP162	-2.16906	down
CEP162	-2.45628	down
CEP162	-2.39505	down
CEP170	2.37566	up
CEP290	-3.78133	down
CEP290	-5.20095	down
CEP57L1	-2.43064	down
CEP63	4.29723	up
CEP63	-2.50326	down
CEP63	-2.12066	down
CEP68	-2.32968	down
CEP70	2.00838	up
CEP70	2.02965	up
CEP70	2.34979	up
CEP70	2.86175	up
CEP70	2.02601	up
CEP70	2.48513	up
CEP72	2.01818	up
CEP72	2.75812	up
CEP72	-6.04306	down
CEP85L	-2.9002	down
CEP85L	-2.56549	down
CEP95	2.63926	up
CEP95	5.84784	up
CEP95	2.85154	up
CEP95	3.22777	up
CERS1	2.47309	up
CERS1	3.64087	up
CERS4	2.8093	up
CERS4	2.52097	up
CERS4	3.0085	up
CERS4	2.79916	up
CERS4	2.4854	up
CERS4	2.60952	up
CERS4	2.04874	up
CERS4	2.66642	up
CES4A	3.42117	up
CES4A	2.6965	up
CETP	4.24891	up
CFAP299	3.6691	up
CFAP54	7.97603	up
CFAP54	5.82029	up
CFAP54	-5.35697	down
CFAP54	3.39411	up
CFAP61	-2.62591	down
CFAP69	-2.18964	down
CFAP69	-2.24429	down
CFAP69	-2.1449	down
CFB	6.24358	up
CFB	6.21656	up
CFB	6.86466	up
CFB	6.13955	up
CFB	5.97247	up
CFB	6.35841	up
CFB	5.92988	up
CFH	-2.68993	down
CFH	-3.22443	down
CFHR4	-2.09935	down
CFI	6.44292	up
CFI	4.60213	up
CFI	4.81371	up
CFI	5.5901	up
CFI	8.06566	up
CFI	2.56611	up
CFI	3.99637	up
CFI	7.06754	up
CFLAR	2.03489	up
CGNL1	2.93653	up
CGNL1	3.68456	up
CGNL1	2.93665	up
CH25H	5.86126	up
CHAC2	2.28555	up
CHAMP1	-2.09868	down
CHCHD5	2.39652	up
CHCHD7	2.51548	up
CHD7	-2.29326	down
CHDH	-2.03643	down
CHEK2	2.68659	up
CHEK2	2.36973	up
CHI3L1	-3.43809	down
CHIC2	-2.267	down
CHKA	-3.12752	down
CHKA	-4.62216	down
CHKA	-4.34132	down
CHKA	-5.30605	down
CHKA	-2.3123	down
CHKA	-2.53066	down
CHML	-2.46978	down
CHN1	5.71934	up
CHODL	-10.9697	down
CHODL	-7.38119	down
CHODL	-8.94355	down
CHODL	-14.3565	down
CHODL	-15.8928	down
CHODL	-11.84	down
CHODL	-11.8492	down
CHODL	-15.9245	down
CHODL	-6.87887	down
CHRDL1	-2.38894	down
CHRDL1	-2.05514	down
CHRDL1	-2.03215	down
CHRDL1	-2.06267	down
CHRDL1	-2.67283	down
CHRDL2	4.42719	up
CHRNA1	-4.55762	down
CHRND	4.24017	up
CHRNE	2.4584	up
CHST10	2.70039	up
CHST11	-2.65891	down
CHST11	-2.19151	down
CHST11	-2.15682	down
CHST12	3.10092	up
CHST12	-5.49589	down
CHST12	2.90018	up
CIART	2.28727	up
CIART	2.02268	up
CIART	2.09021	up
CIB2	4.54477	up
CIB4	12.1737	up
CIB4	-4.26256	down
CIDEC	-3.08123	down
CITED2	-2.39228	down
CITED2	-2.50894	down
CITED2	-2.48907	down
CKMT1B	-2.96116	down
CLCN2	4.03729	up
CLCN2	2.67009	up
CLCN5	2.83274	up
CLDN10	3.63405	up
CLDN11	-3.74631	down
CLDN11	-2.08075	down
CLEC14A	-8.16656	down
CLEC18A	2.32956	up
CLEC1A	4.53778	up
CLEC1A	10.2617	up
CLEC1A	6.6971	up
CLEC1A	12.889	up
CLEC1A	4.21707	up
CLEC1A	7.43809	up
CLEC4M	4.73002	up
CLGN	5.20029	up
CLHC1	2.07654	up
CLIC1	4.03827	up
CLIP4	-3.10326	down
CLIP4	-2.64064	down
CLRN1	10.7189	up
CLSTN2	-5.85572	down
CLTRN	5.74989	up
CLU	2.30867	up
CMC1	-2.3038	down
CMC2	2.07923	up
CMC2	-2.41812	down
CMIP	-3.95902	down
CMPK2	30.4971	up
CMPK2	34.3589	up
CMPK2	39.342	up
CMPK2	43.4086	up
CMPK2	26.3324	up
CMTM4	-2.0218	down
CMTR2	-4.26616	down
CMYA5	4.89747	up
CMYA5	5.40653	up
CMYA5	3.21462	up
CNKSR1	2.44347	up
CNKSR2	3.43801	up
CNKSR2	4.53932	up
CNMD	19.6625	up
CNN1	-3.31585	down
CNN1	-2.51001	down
CNN1	-2.941	down
CNN1	-2.96563	down
CNN1	-3.2912	down
CNN1	-3.308	down
CNN1	-3.86831	down
CNN3	2.22315	up
CNPPD1	2.00837	up
CNPY3	2.33601	up
CNR2	-2.73955	down
CNTFR	4.20609	up
CNTFR	2.04487	up
CNTFR	2.19289	up
CNTLN	-2.38464	down
CNTLN	-2.15714	down
CNTLN	-4.39671	down
CNTN3	4.56508	up
CNTN3	4.08919	up
CNTN3	3.59736	up
CNTN3	5.17349	up
CNTN3	3.91204	up
CNTNAP2	-5.73524	down
COA1	5.60139	up
COA1	3.00562	up
COA1	4.24723	up
COA1	2.45493	up
COA1	2.5235	up
COA1	-2.64752	down
COA1	2.65978	up
COA1	2.75223	up
COA1	2.9716	up
COA1	2.87954	up
COA1	2.19764	up
COA1	3.25141	up
COA1	2.32141	up
COA1	2.39703	up
COA1	3.38875	up
COA1	2.92222	up
COA1	2.67064	up
COA1	4.16988	up
COA1	2.62089	up
COA1	2.73215	up
COL11A1	-2.51196	down
COL11A1	-2.40784	down
COL11A1	-2.6037	down
COL11A1	-2.12488	down
COL11A1	-2.3949	down
COL11A1	-2.23498	down
COL12A1	-3.5278	down
COL12A1	-3.59327	down
COL12A1	-3.50146	down
COL12A1	-3.19163	down
COL12A1	-3.50216	down
COL12A1	-3.0822	down
COL13A1	3.15818	up
COL13A1	5.38894	up
COL13A1	4.76693	up
COL13A1	4.17886	up
COL13A1	3.82326	up
COL13A1	2.64914	up
COL13A1	3.82402	up
COL13A1	6.6007	up
COL13A1	3.87499	up
COL13A1	4.88019	up
COL13A1	2.90212	up
COL13A1	2.95756	up
COL13A1	3.29196	up
COL13A1	3.21327	up
COL13A1	4.88484	up
COL13A1	4.4013	up
COL13A1	2.40668	up
COL13A1	3.58344	up
COL13A1	3.79249	up
COL13A1	3.34822	up
COL13A1	4.07762	up
COL13A1	3.52155	up
COL13A1	3.92049	up
COL13A1	4.11996	up
COL13A1	4.73038	up
COL13A1	3.69958	up
COL13A1	2.89783	up
COL13A1	3.26466	up
COL13A1	5.36483	up
COL13A1	4.27762	up
COL13A1	3.71561	up
COL13A1	3.45326	up
COL13A1	3.51525	up
COL13A1	4.77039	up
COL13A1	3.64808	up
COL13A1	5.14815	up
COL14A1	7.56804	up
COL14A1	4.3898	up
COL14A1	4.27245	up
COL14A1	3.63389	up
COL15A1	7.13313	up
COL15A1	6.68856	up
COL17A1	3.24721	up
COL1A1	-4.83109	down
COL1A1	-5.01203	down
COL1A1	-5.78956	down
COL1A1	-4.90719	down
COL21A1	-2.57314	down
COL21A1	-4.02502	down
COL21A1	-3.33311	down
COL21A1	-2.89385	down
COL21A1	-3.50355	down
COL21A1	-3.12336	down
COL21A1	-3.4322	down
COL21A1	-2.96484	down
COL21A1	-3.23559	down
COL21A1	-2.68498	down
COL21A1	-2.41352	down
COL21A1	-3.06182	down
COL21A1	-3.15037	down
COL21A1	-3.31209	down
COL21A1	-2.09612	down
COL22A1	-2.3116	down
COL22A1	-2.2307	down
COL22A1	-2.12224	down
COL24A1	5.6019	up
COL27A1	2.74757	up
COL27A1	2.99688	up
COL28A1	2.52729	up
COL28A1	3.73764	up
COL3A1	-3.10289	down
COL4A1	-11.3569	down
COL4A2	-6.78092	down
COL4A3	2.2785	up
COL4A4	-8.64602	down
COL4A4	-2.16026	down
COL4A4	-2.96271	down
COL4A5	-2.17321	down
COL4A5	-2.58718	down
COL4A5	-2.16639	down
COL4A5	-3.3827	down
COL5A1	-2.30881	down
COL5A1	-2.24318	down
COL5A1	-2.49536	down
COL5A1	-2.38788	down
COL5A3	-3.78291	down
COL5A3	-37.6561	down
COL5A3	-26.7845	down
COL6A3	-3.39596	down
COL6A3	-3.49876	down
COL6A3	-3.48083	down
COL6A3	-2.69343	down
COL6A3	-3.86434	down
COL6A3	-4.45949	down
COL6A3	-3.49469	down
COL6A3	-3.39459	down
COL6A3	-3.24611	down
COL6A3	-3.36306	down
COL6A5	-3.55883	down
COL7A1	2.15208	up
COL8A1	-20.2467	down
COL8A1	-18.8133	down
COL8A2	-2.2346	down
COL8A2	-3.19631	down
COL9A3	4.90604	up
COLCA2	4.97763	up
COMMD10	-4.25536	down
COPZ2	2.08425	up
CORIN	-4.38459	down
[truncated: 7,568 more rows]
